# Supplementary material for: Enhanced Thermal Conductivity of Polyamide-Based Nanocomposites Containing Graphene Oxide Sheets Decorated with Compatible Polymer Brushes
Source: MDPI journal article supplement (doi:10.3390/ma14040751), 2021-02-05
Supplement: s1 [file s1]

Supplementary

# Enhanced Thermal Conductivity of Polyamide-Based Nanocomposites Containing Graphene Oxide Sheets Decorated with Compatible Polymer Brushes

Łukasz Łątka <sup>1,2</sup>, Kamil Goc <sup>3</sup>, Czesław Kapusta <sup>3</sup> and Szczepan Zapotoczny <sup>1,\*</sup>

<sup>1</sup> Faculty of Chemistry, Jagiellonian University, Gronostajowa 2, 30-387 Krakow, Poland; lat.lukasz@gmail.com

<sup>2</sup> Research and Development Center, Azoty Group S.A., Kwiatkowskiego 8, 33-101 Tarnow, Poland

<sup>3</sup> Faculty of Physics and Applied Computer Science, AGH University of Science and Technology, Mickiewicza Av. 30, 30-059 Krakow, Poland; kamil.goc@fis.agh.edu.pl (K.G.); kapusta@agh.edu.pl (C.K.)

\* Correspondence: zapotocz@chemia.uj.edu.pl; Tel.: +48 12 686 2530

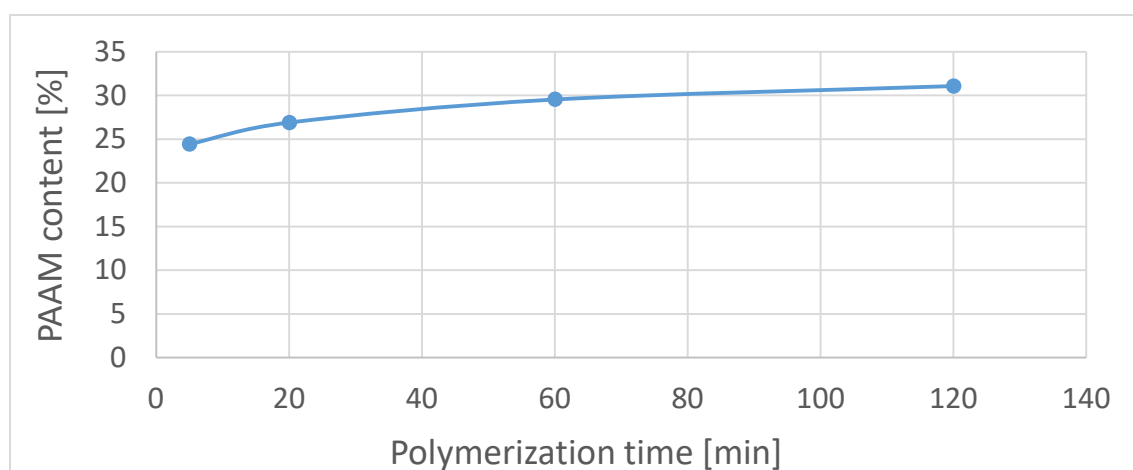

**Figure S1.** Plot of the PAAM content in the GO-PAAM samples versus the polymerization time.

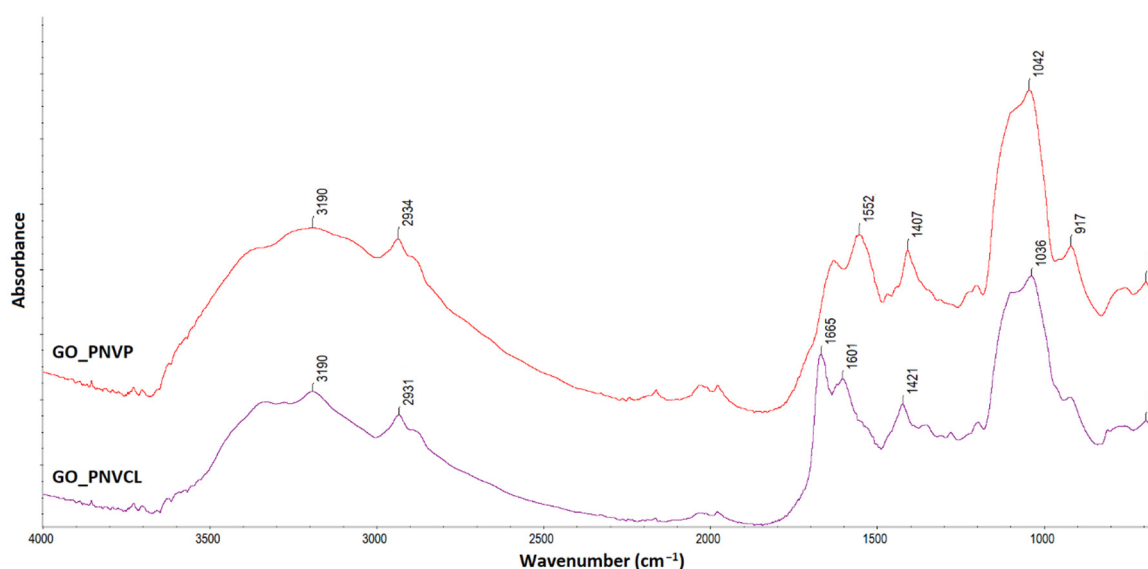

**Figure S2.** Normalized FTIR spectra of the GO\_PNVp and GO\_PNVCL.

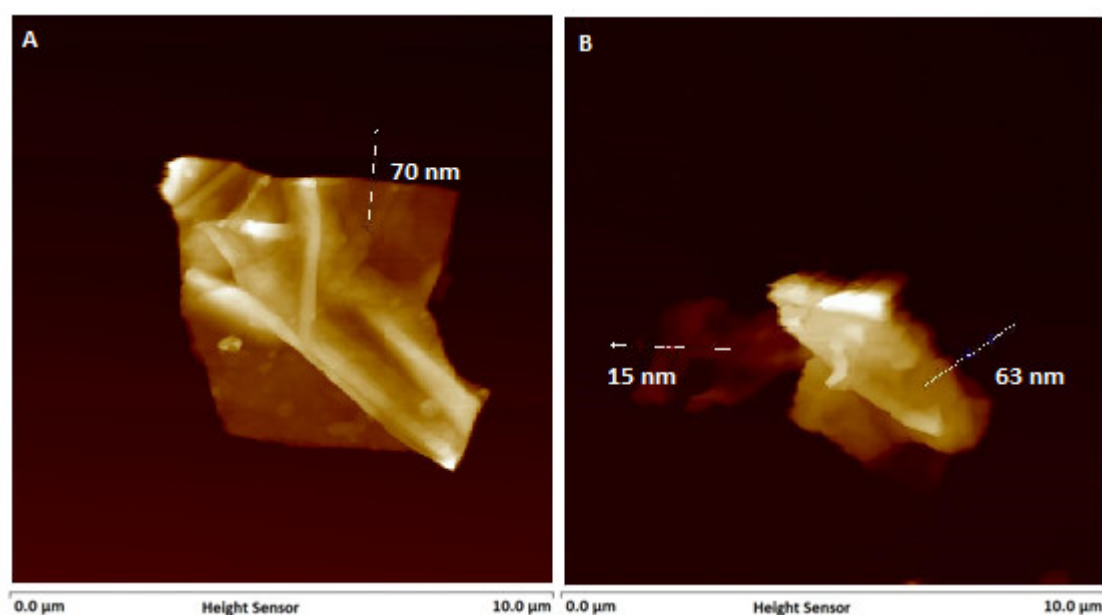

**Figure S3.** AFM topography images in air of (A) GO\_PNVCL, and (B) GO\_PNVVP with example heights of the samples.

**Table S1.** Results of the elemental analyses of the parent GO and the GO samples decorated with polymer brushes together with the calculated polymer content.

| Samples        | N [%] | C [%] | H [%] | Polymer Content [%]<br>based on C:N Ratio |
|----------------|-------|-------|-------|-------------------------------------------|
| GO             | 0     | 39.52 | 4.53  | 0                                         |
| GO_PAAM 5 min  | 4.77  | 41.82 | 4.67  | 24                                        |
| GO_PAAM 20 min | 5.22  | 41.84 | 4.72  | 27                                        |
| GO_PAAM 1 h    | 5.65  | 41.51 | 4.87  | 30                                        |
| GO_PAAM 2 h    | 5.95  | 41.74 | 5.01  | 31                                        |
| GO_PNVCL       | 4.83  | 44.90 | 5.00  | 23                                        |
| GO_PNVVP       | 4.70  | 44.54 | 4.84  | 23                                        |

**Table S2.** Mechanical properties of the PA6/GO\_PNVCL and PA6/GO\_PNVVP composites containing 1% of the decorated GO samples.

| Properties                     | Unit              | PA6/GO_PNVCL | PA6/GO_PNVVP |
|--------------------------------|-------------------|--------------|--------------|
| Yield point                    | MPa               | 47.6 ± 0.6   | 49 ± 0.9     |
| Yield point elongation         | %                 | 6.4 ± 2.1    | 8.3 ± 1.1    |
| Tensile strength               | MPa               | 38.5 ± 1.1   | 42 ± 1.4     |
| Elongation at break            | %                 | 161 ± 51     | 224 ± 13     |
| Tensile modulus                | MPa               | 1430 ± 32    | 1330 ± 51    |
| Charpy notched impact strength | kJ/m <sup>2</sup> | 4.1 ± 0.1    | 4.0 ± 0.3    |
| Charpy impact strength         | kJ/m <sup>2</sup> | 49 ± 10      | 77 ± 25      |

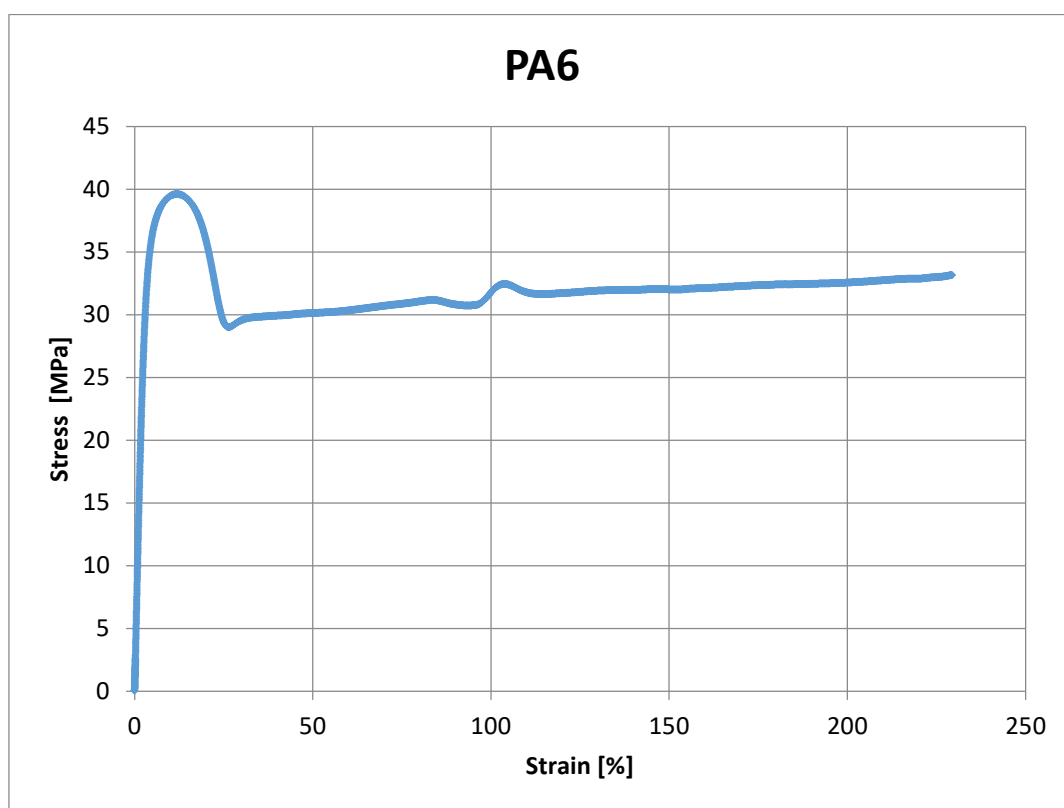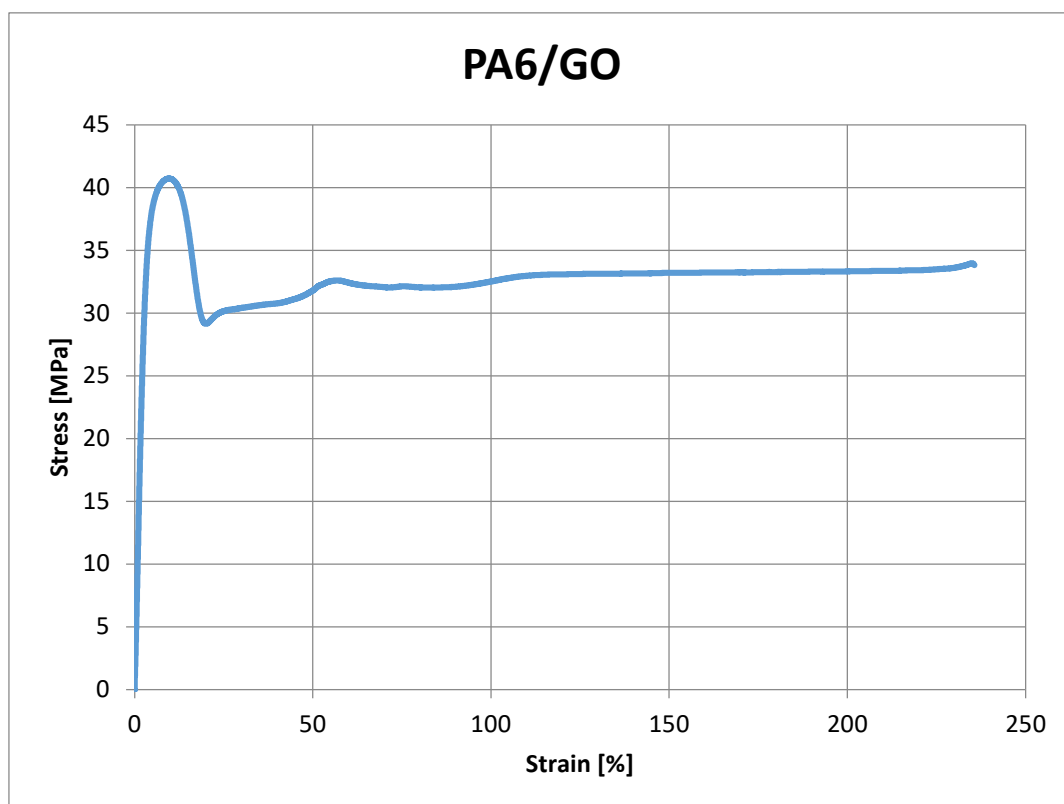

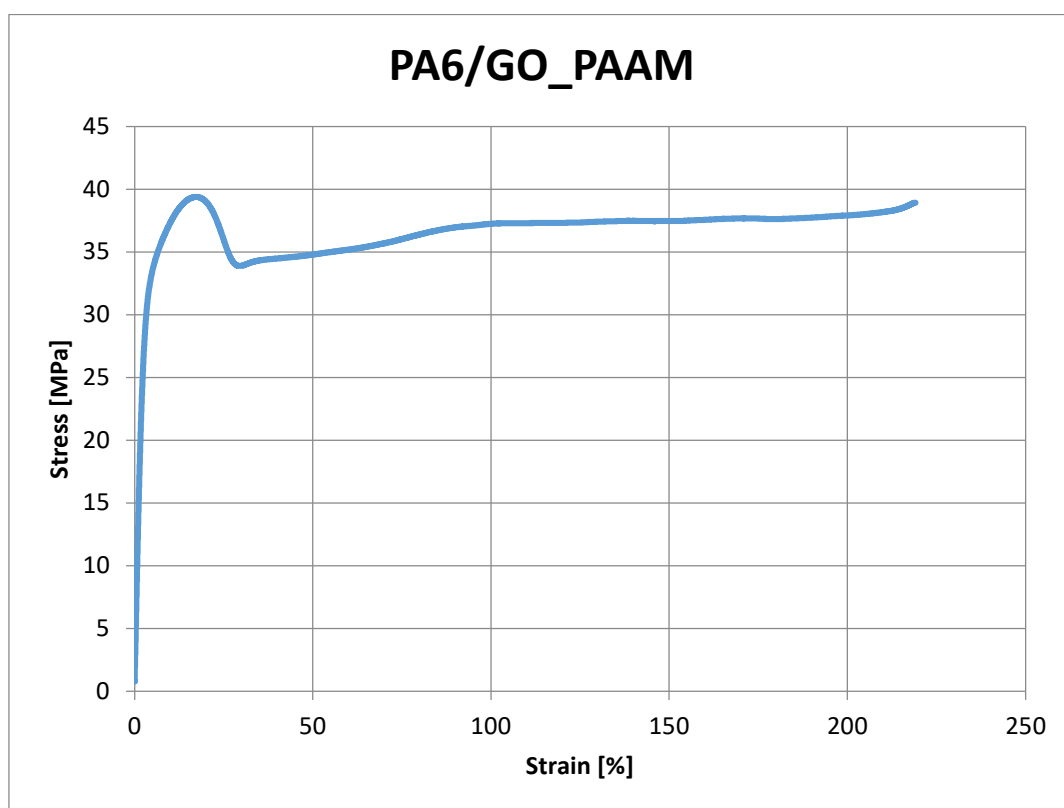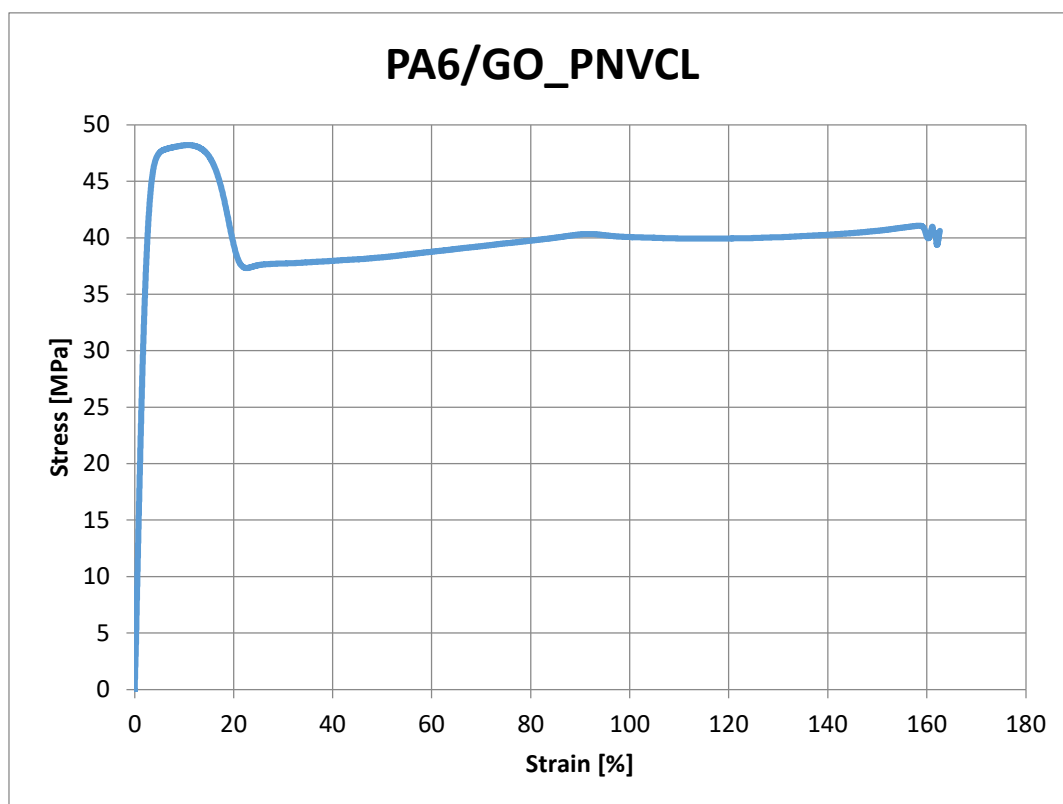

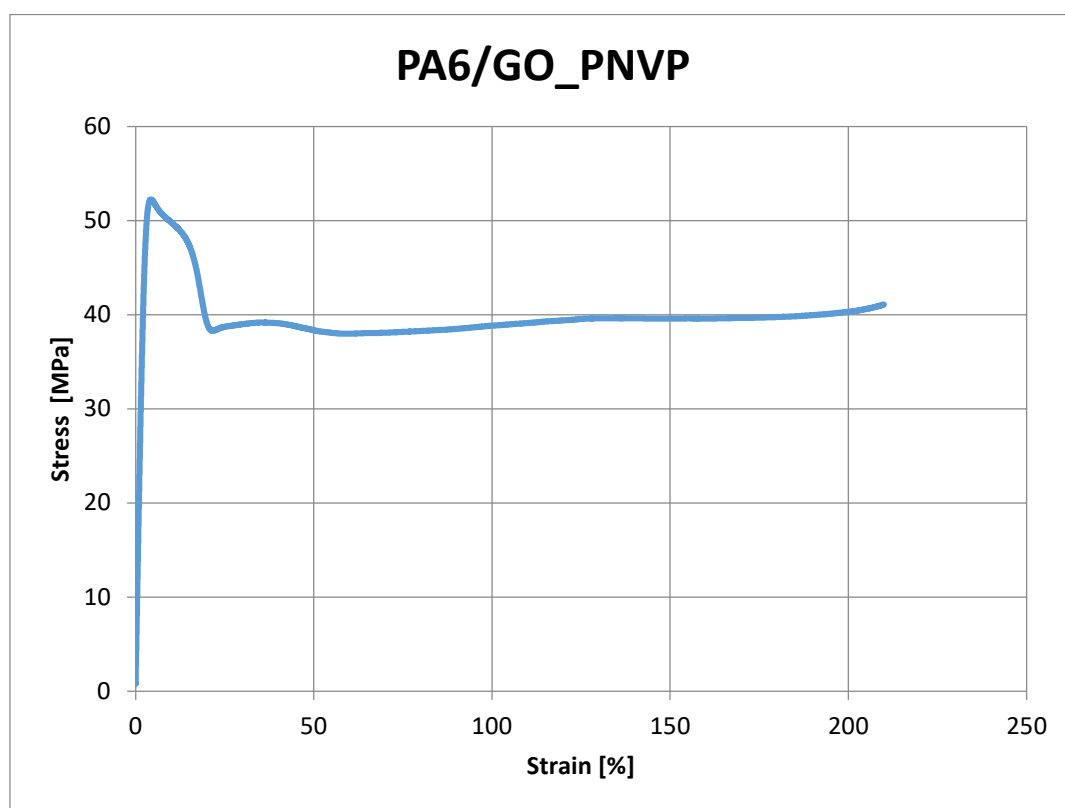

**Figure S4.** Representative stress-strain curves obtained for PA6 and respective nanocomposites.
